# Supplementary material
Source: ML conference proceedings conference paper supplement (https://openaccess.thecvf.com/content/CVPR_2019/html/Tosi_Learning_Monocular_Depth_CVPR_2019_paper.html)
Supplement: Supplementary file 1 [file Tosi_Learning_Monocular_Depth_CVPR_2019_supplemental.pdf]

## Supplementary material

This document provides additional details concerned with CVPR 2019 paper "Learning monocular depth estimation infusing traditional stereo knowledge". We have included the detailed specification of our depth-from-mono architecture *monocular Residual Matching* (*monoResMatch*), additional quantitative results and more visual depth maps on KITTI and CityScapes datasets.

### 1. Specification of monoResMatch

The detailed specification of our network provided in Table 1 can be divided into three modules: the multi-scale feature extractor, the initial disparity estimator and the final disparity refinement stage. For each layer of the network, we report convolution kernel size **K**, stride **S**, the input and output number of channels and the input of the layer. The symbol “;” means concatenation.

### 2. Depth Estimation with 50 cap

In this section, we report additional experimental results on the Eigen’s KITTI test split [1], evaluating depth maps within 0-50 m range. Table 2 shows a comparison between our architecture *monoResMatch* and other works reporting this quantitative evaluation, confirming once again the superiority of our proposal compared to all competitors.

### 3. Qualitative results

Our paper has shown several disparity maps predicted by the proposed architecture. As a supplement, we report in this document more outcomes of our network using both Cityscapes and KITTI datasets. Figure 1 shows qualitative results on the test set of KITTI stereo 2015 [6] generated by *monoResMatch* fine-tuned on the 200-act ground-truth labels of the training set. In Figure 1, the disparity and error images are extracted from the KITTI evaluation website. Disparity images are shown using the color map from [3]. For the error images, warmer color indicates larger errors in depth prediction. In Figure 2, we visualize disparity maps on the Cityscapes dataset. As suggested in [4], we discarded the lower 20% of the input image to delete the hood of the car. Moreover, we resized the input shape to  $1024 \times 512$  resolution. Figure 4 presents results comparing three different configurations of *monoResMatch*. Specifically, we analyze visual effects of the network trained on 1) Semi-Global Matching proxy labels with those obtained by 2) fine-tuning on 200 accurate ground-truth labels of KITTI 2015 and 3) on 700 raw LiDAR samples from the Eigen training split.

Finally, in Figure 4 we report qualitative comparison with other state-of-the-art methods on the Eigen test split.

| Layer                                | K | S | In/Out    | Input                                        |
|--------------------------------------|---|---|-----------|----------------------------------------------|
| <b>Multi-scale feature extractor</b> |   |   |           |                                              |
| conv1                                | 7 | 2 | 3/64      | input                                        |
| up_conv1                             | 4 | 2 | 64/32     | conv1                                        |
| conv2                                | 5 | 2 | 64/128    | conv1                                        |
| up_conv2                             | 8 | 4 | 128/32    | conv2                                        |
| up_conv12                            | 1 | 1 | 64/32     | up_conv1, up_conv2                           |
| <b>Initial Disparity Estimation</b>  |   |   |           |                                              |
| conv_rdi                             | 1 | 1 | 128/64    | conv2                                        |
| conv3                                | 3 | 2 | 64/256    | conv_rdi                                     |
| conv3_1                              | 3 | 1 | 256/256   | conv3                                        |
| conv4                                | 3 | 2 | 256/512   | conv3_1                                      |
| conv4_1                              | 3 | 1 | 512/512   | conv4                                        |
| conv5                                | 3 | 2 | 512/512   | conv4_1                                      |
| conv5_1                              | 3 | 1 | 512/512   | conv5                                        |
| conv6                                | 3 | 2 | 512/1024  | conv5_1                                      |
| conv6_1                              | 3 | 1 | 1024/1024 | conv6                                        |
| disp6                                | 3 | 1 | 1024/2    | conv6_1                                      |
| upconv5                              | 4 | 2 | 1024/512  | conv6_1                                      |
| updisp6                              | 4 | 2 | 2/1       | disp6                                        |
| iconv5                               | 4 | 1 | 1025/512  | upconv5, updisp6, conv5_1                    |
| disp5                                | 3 | 1 | 512/2     | iconv5                                       |
| upconv4                              | 4 | 2 | 512/256   | iconv5                                       |
| updisp5                              | 4 | 2 | 2/1       | disp5                                        |
| iconv4                               | 4 | 1 | 769/512   | upconv4, updisp5, conv4_1                    |
| disp4                                | 3 | 1 | 256/2     | iconv4                                       |
| upconv3                              | 4 | 2 | 256/128   | iconv4                                       |
| updisp4                              | 4 | 2 | 2/1       | disp4                                        |
| iconv3                               | 4 | 1 | 385/128   | upconv3, updisp4, conv3_1                    |
| disp3                                | 3 | 1 | 128/2     | iconv3                                       |
| upconv2                              | 4 | 2 | 128/64    | iconv3                                       |
| updisp3                              | 4 | 2 | 2/1       | disp3                                        |
| iconv2                               | 4 | 1 | 193/64    | upconv2, updisp3, conv2_1                    |
| disp2                                | 3 | 1 | 64/2      | iconv2                                       |
| upconv1                              | 4 | 2 | 64/32     | iconv2                                       |
| updisp2                              | 4 | 2 | 2/1       | disp2                                        |
| iconv1                               | 4 | 1 | 97/32     | upconv1, updisp2, conv1_1                    |
| disp1                                | 3 | 1 | 32/2      | iconv1                                       |
| upconv0                              | 4 | 2 | 32/16     | iconv1                                       |
| updisp1                              | 4 | 2 | 2/1       | disp1                                        |
| iconv0                               | 4 | 1 | 49/32     | upconv0, updisp1, up_conv12                  |
| disp0                                | 3 | 1 | 32/2      | iconv0                                       |
| <b>Warping</b>                       |   |   |           |                                              |
| wr_conv1                             | - | - | 64/64     | conv1                                        |
| wr_up_conv12                         | - | - | 32/32     | up_conv12                                    |
| wl_up_conv12                         | - | - | 32/32     | wr_up_conv12                                 |
| <b>Disparity Refinement</b>          |   |   |           |                                              |
| r_conv0                              | 3 | 1 | 66/32     | [up_conv12 - wl_up_conv12], disp0, up_conv12 |
| r_conv1                              | 3 | 2 | 32/64     | r_conv0                                      |
| c_conv1                              | 3 | 1 | 64/16     | conv1                                        |
| wr_c_conv1                           | 3 | 1 | 64/16     | wr_conv1                                     |
| r_corr                               | - | - | 16/41     | c_conv1, wr_c_conv1                          |
| r_conv1_1                            | 3 | 1 | 105/64    | r_corr, r_conv1                              |
| r_conv2                              | 3 | 2 | 64/128    | r_conv1_1                                    |
| r_conv2_1                            | 3 | 1 | 128/128   | r_conv2                                      |
| r_res2                               | 3 | 1 | 130/1     | r_conv2_1, disp2                             |
| up_r_res2                            | 3 | 2 | 1/2       | r_res2                                       |
| r_upconv1                            | 4 | 2 | 64/128    | r_conv2_1                                    |
| r_iconv1                             | 4 | 1 | 130/64    | r_upconv1, up_r_res2, r_conv1_1              |
| r_res1                               | 3 | 1 | 66/1      | r_iconv1, disp1                              |
| up_r_res1                            | 3 | 2 | 1/2       | r_res1                                       |
| r_upconv0                            | 4 | 2 | 32/64     | r_conv1                                      |
| r_iconv0                             | 4 | 1 | 66/32     | r_upconv0, up_r_res1, r_conv0                |
| r_res0                               | 3 | 1 | 34/1      | r_iconv0, disp0                              |

Table 1. Detailed *monoResMatch* architecture.

## References

- [1] David Eigen, Christian Puhrsch, and Rob Fergus. Depth map prediction from a single image using a multi-scale deep net-

| Method                                 | Supervision | Train set       | Abs Rel      | Sq Rel       | Lower is better |              | Higher is better |                   |                   |
|----------------------------------------|-------------|-----------------|--------------|--------------|-----------------|--------------|------------------|-------------------|-------------------|
|                                        |             |                 |              |              | RMSE            | RMSE log     | $\delta < 1.25$  | $\delta < 1.25^2$ | $\delta < 1.25^3$ |
| Zhou <i>et al.</i> [11]                | Seq         | CS,K            | 0.190        | 1.436        | 4.975           | 0.258        | 0.735            | 0.915             | 0.968             |
| Yin <i>et al.</i> [10] GeoNet ResNet50 | Seq         | K               | 0.147        | 0.936        | 4.348           | 0.218        | 0.810            | 0.941             | 0.977             |
| Zou <i>et al.</i> [12]                 | Seq         | CS,K            | 0.146        | 1.182        | 5.215           | 0.213        | 0.818            | 0.943             | 0.978             |
| Mahjourian <i>et al.</i> [5]           | Seq         | CS,K            | 0.151        | 0.949        | 4.383           | 0.227        | 0.802            | 0.935             | 0.974             |
| Poggi <i>et al.</i> [7] PyD-Net (200)  | Stereo      | CS,K            | 0.138        | 0.937        | 4.488           | 0.230        | 0.815            | 0.934             | 0.972             |
| Godard <i>et al.</i> [4] ResNet50      | Stereo      | CS,K            | 0.108        | 0.657        | 3.729           | 0.194        | 0.873            | 0.954             | 0.979             |
| Poggi <i>et al.</i> [8] 3Net ResNet50  | Stereo      | CS,K            | <b>0.091</b> | 0.572        | 3.459           | 0.183        | 0.889            | 0.955             | 0.979             |
| Yang <i>et al.</i> [9]                 | Seq+Stereo  | $K_o, K_r, K_o$ | 0.092        | 0.547        | 3.390           | 0.177        | 0.898            | 0.962             | 0.982             |
| <b>monoResMatch</b>                    | Stereo      | CS,K            | <b>0.091</b> | <b>0.504</b> | <b>3.336</b>    | <b>0.174</b> | <b>0.899</b>     | <b>0.965</b>      | <b>0.984</b>      |

Table 2. Quantitative evaluation on the test set of KITTI dataset [2] using the split of Eigen *et al.* [1], with maximum depth set to 50m.  $K_o$ ,  $K_r$ ,  $K_o$  are splits from K, defined in [9]. Best results are shown in bold.

work. In *Advances in neural information processing systems*, pages 2366–2374, 2014. 1, 2

- [2] Andreas Geiger, Philip Lenz, Christoph Stiller, and Raquel Urtasun. Vision meets robotics: The kitti dataset. *International Journal of Robotics Research (IJRR)*, 2013. 2
- [3] Andreas Geiger, Philip Lenz, and Raquel Urtasun. Are we ready for autonomous driving? the kitti vision benchmark suite. In *Computer Vision and Pattern Recognition (CVPR), 2012 IEEE Conference on*, pages 3354–3361. IEEE, 2012. 1
- [4] Clément Godard, Oisin Mac Aodha, and Gabriel J. Brostow. Unsupervised monocular depth estimation with left-right consistency. In *CVPR*, 2017. 1, 2, 5
- [5] Reza Mahjourian, Martin Wicke, and Anelia Angelova. Unsupervised learning of depth and ego-motion from monocular video using 3d geometric constraints. In *The IEEE Conference on Computer Vision and Pattern Recognition (CVPR)*, 2018. 2
- [6] Moritz Menze and Andreas Geiger. Object scene flow for autonomous vehicles. In *Conference on Computer Vision and Pattern Recognition (CVPR)*, 2015. 1
- [7] Matteo Poggi, Filippo Aleotti, Fabio Tosi, and Stefano Mattoccia. Towards real-time unsupervised monocular depth estimation on cpu. In *IEEE/RSJ Conference on Intelligent Robots and Systems (IROS)*, 2018. 2
- [8] Matteo Poggi, Fabio Tosi, and Stefano Mattoccia. Learning monocular depth estimation with unsupervised trinocular assumptions. In *6th International Conference on 3D Vision (3DV)*, 2018. 2
- [9] Nan Yang, Rui Wang, Jörg Stückler, and Daniel Cremers. Deep virtual stereo odometry: Leveraging deep depth prediction for monocular direct sparse odometry. In *European Conference on Computer Vision*, pages 835–852. Springer, 2018. 2
- [10] Zhichao Yin and Jianping Shi. Geonet: Unsupervised learning of dense depth, optical flow and camera pose. In *The IEEE Conference on Computer Vision and Pattern Recognition (CVPR)*, 2018. 2, 5
- [11] Tinghui Zhou, Matthew Brown, Noah Snavely, and David G Lowe. Unsupervised learning of depth and ego-motion from video. In *CVPR*, volume 2, page 7, 2017. 2, 5
- [12] Yuliang Zou, Zelun Luo, and Jia-Bin Huang. Df-net: Unsupervised joint learning of depth and flow using cross-task consistency. In *European Conference on Computer Vision*, pages 38–55. Springer, 2018. 2

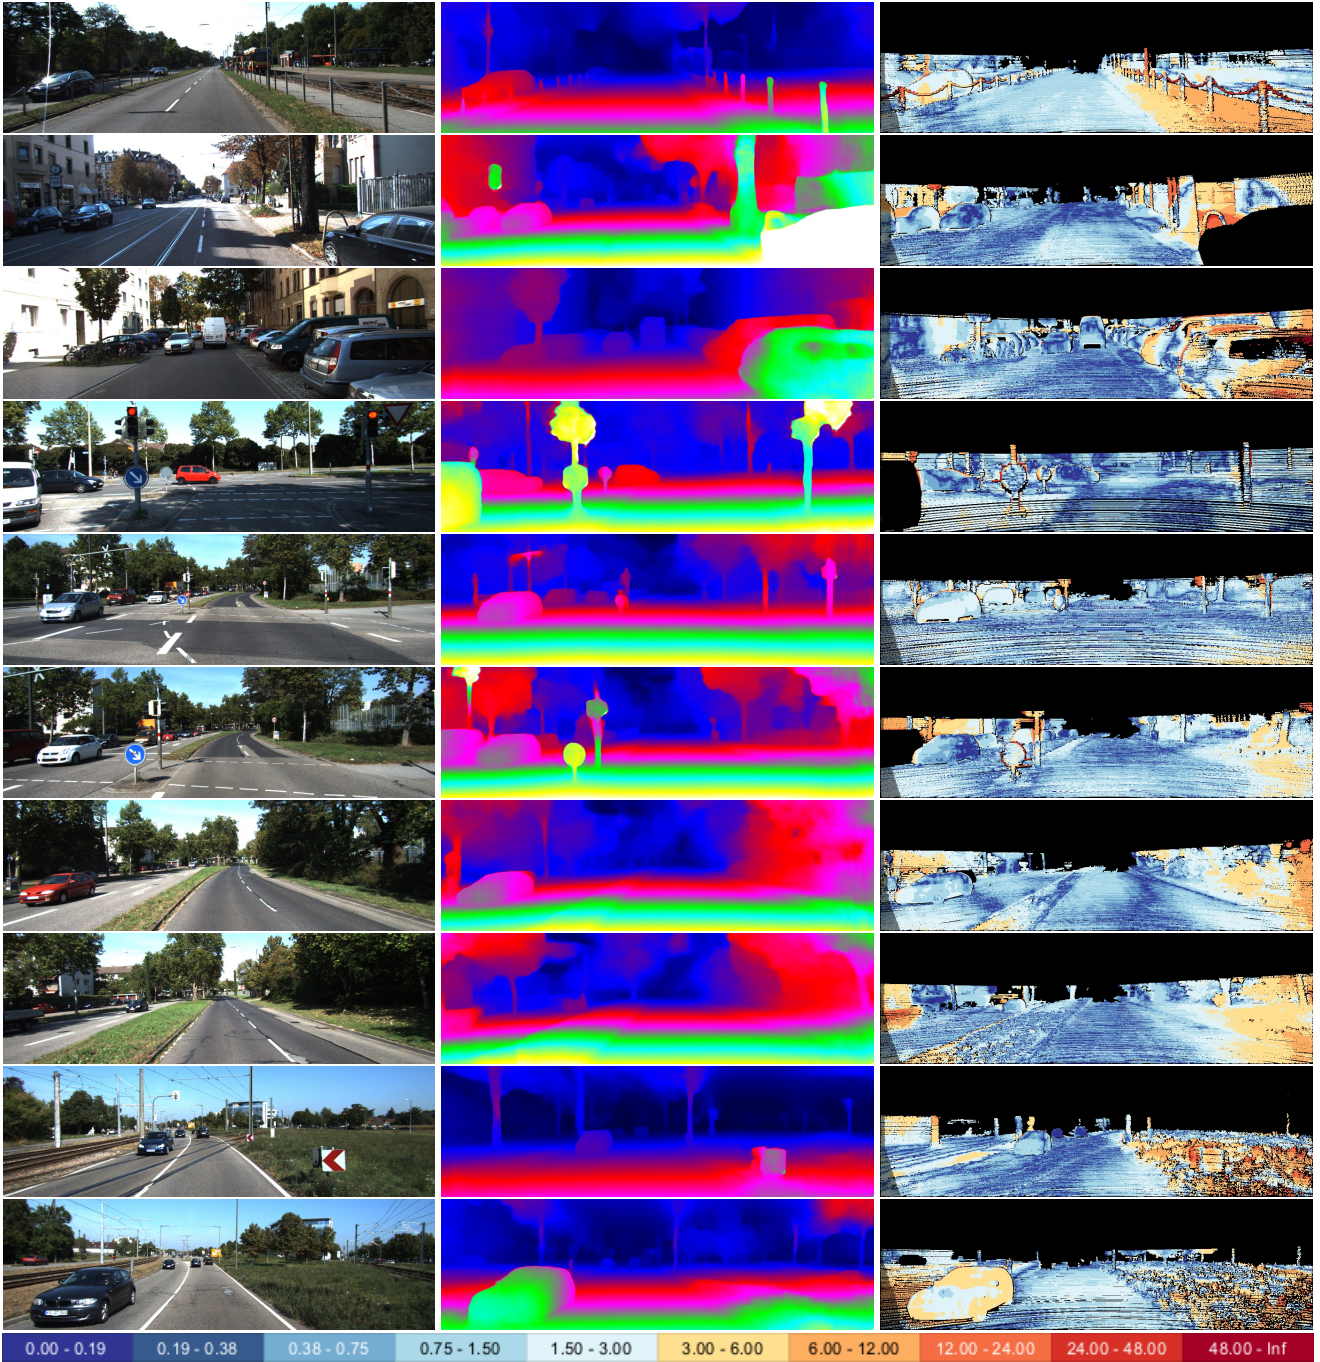

Figure 1. Stereo evaluation of our depth-from-mono framework. From left to right the input image, the predicted disparity and the errors with respect to ground truth. The last line reports the color code used to display the seriousness of the shortcomings.



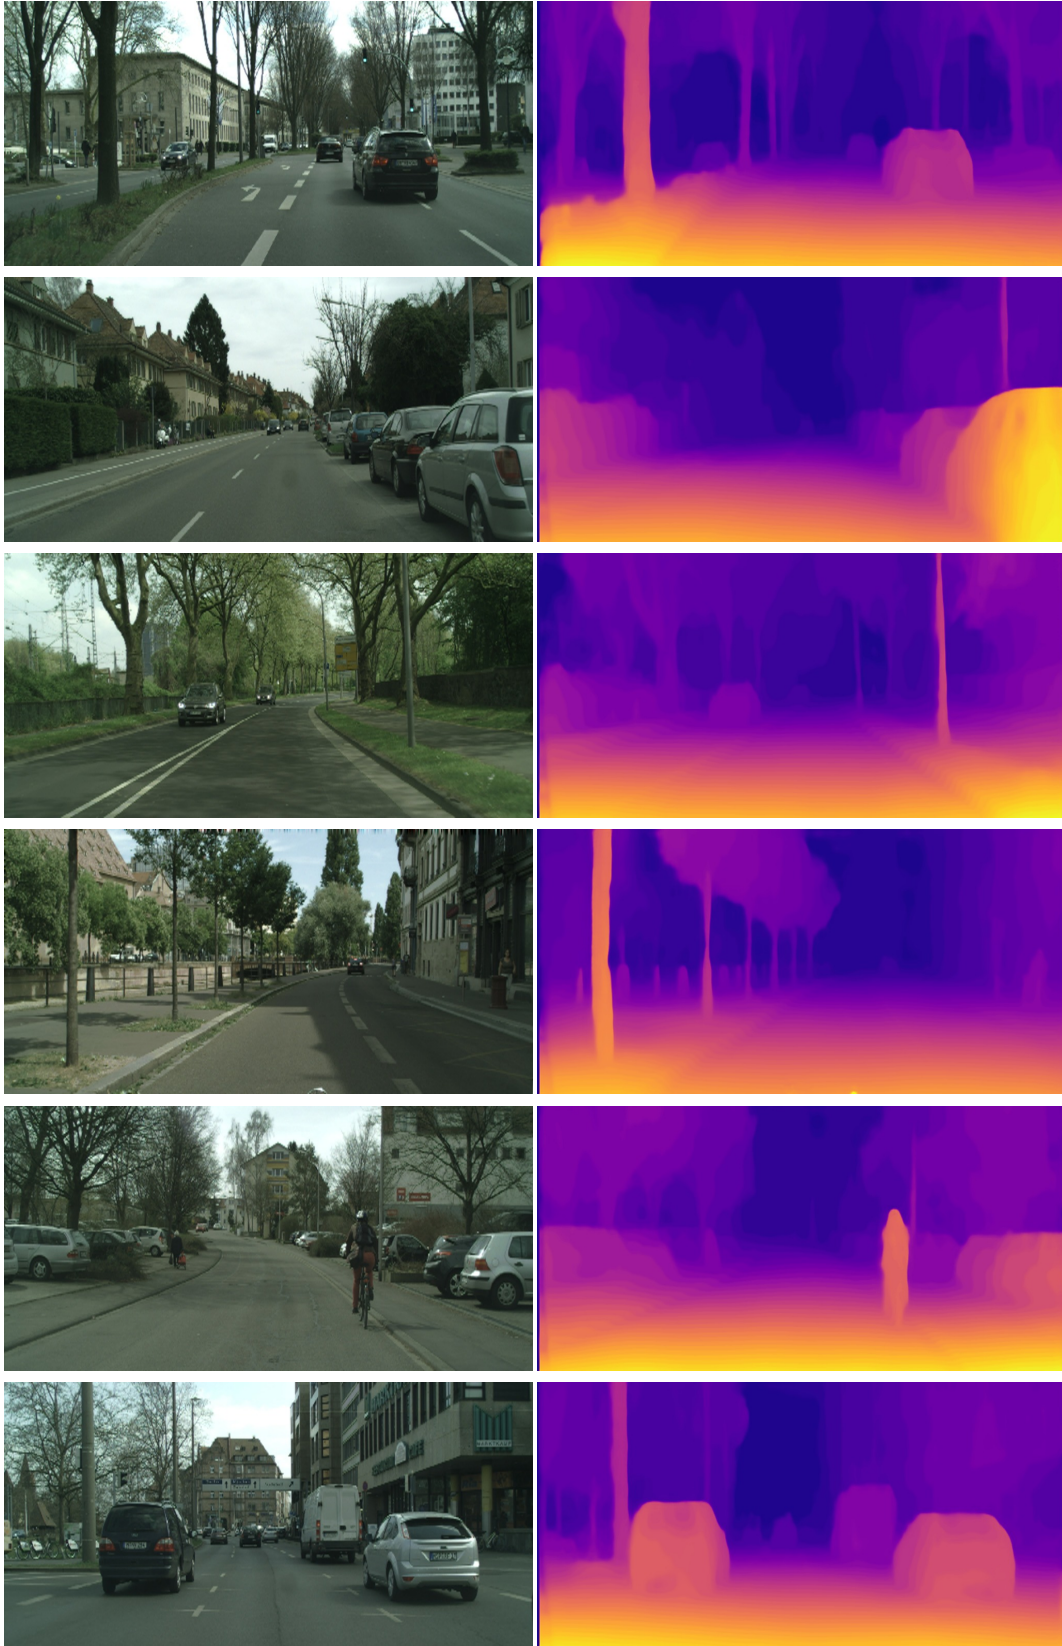

Figure 2. Qualitative results of monoResMatch trained semi-supervisedly using SGM on Cityscapes dataset.

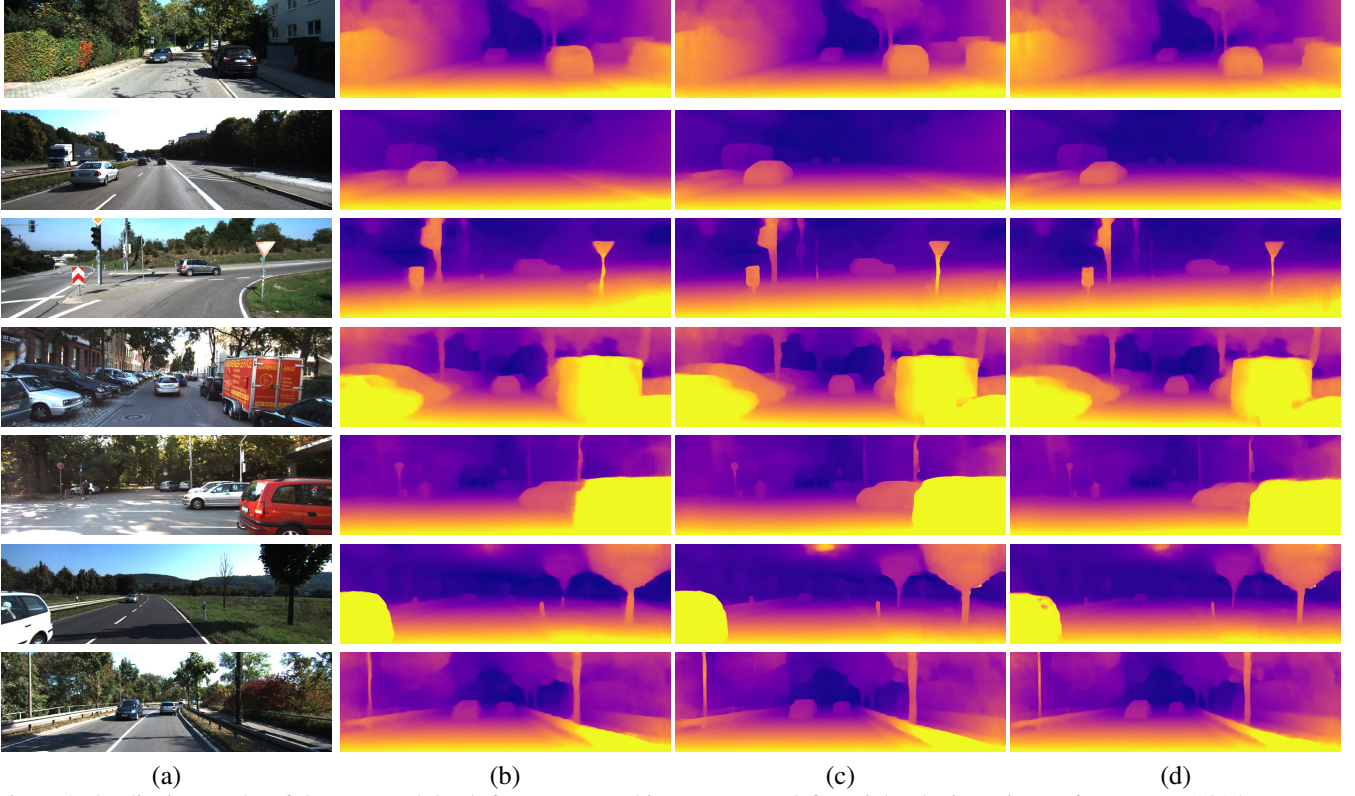

Figure 3. Qualitative results of the proposed depth-from-mono architecture. From left to right, the input image from KITTI 2015 test set (a), the predicted depth by monoResMatch trained on (b) SGM proxy annotations, fine-tuned using (c) 200-act ground-truth labels or (d) 200-act + 700 raw LiDAR samples.

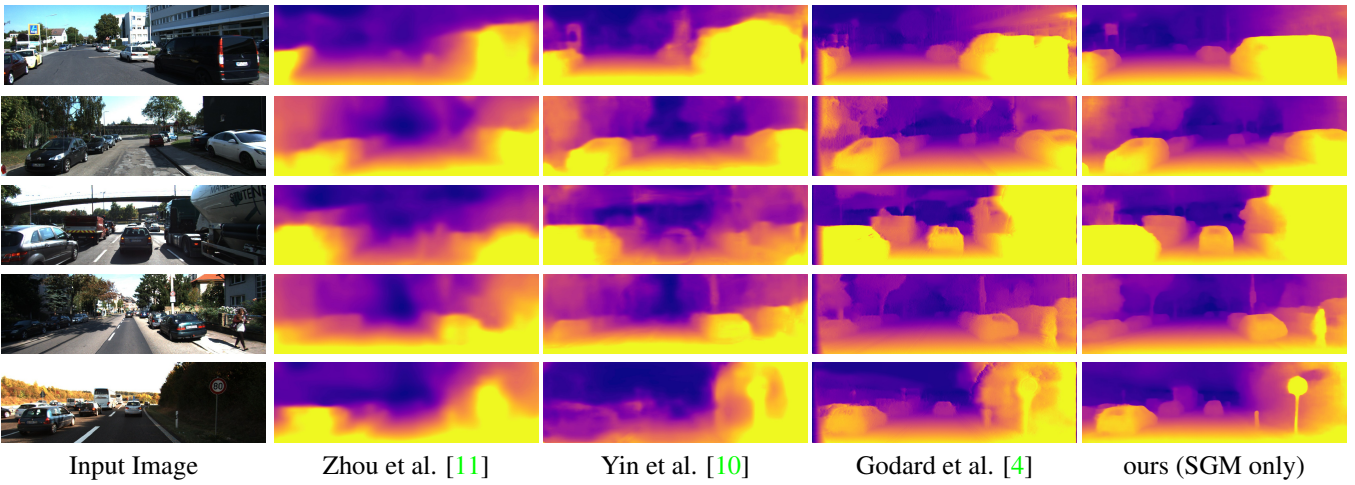

Figure 4. Qualitative comparison with state-of-the-art methods on Eigen’s KITTI test split. For our network and [4] no post-processing operation has been applied.
